# Supplementary material
Source: PubMed Central journal article supplement (PMC4385185)
Supplement: mmc1.pdf [file mmc1.pdf]

The American Journal of Human Genetics

Supplemental Data

**Chromothripsis in Healthy Individuals  
Affects Multiple Protein-Coding Genes and Can  
Result in Severe Congenital Abnormalities in Offspring**

Mirjam S. de Pagter, Markus J. van Roosmalen, Annette F. Baas, Ivo Renkens, Karen J. Duran, Ellen van Binsbergen, Masoumeh Tavakoli-Yaraki, Ron Hochstenbach, Lars T. van der Veken, Edwin Cuppen, and Wigard P. Kloosterman

## Supplemental Figures

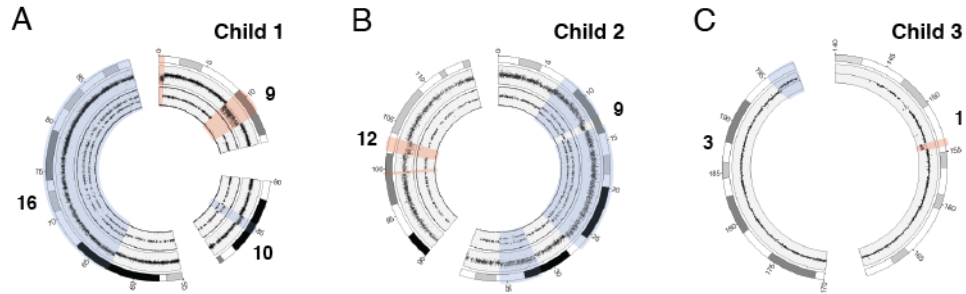

**Figure S1.** Circos plots displaying CNVs identified in child 1 (A), 2 (B) and 3 (C). CNVs were detected using Illumina SNParrays (CytoSNP-850K for case 1 and HumanCNV370 arrays for case 2) or custom Agilent 105k microarrays (Amadid 019015; case 3). Deletions and duplications were detected using Nexus software and are highlighted in red and blue, respectively. (A) Circos plot displaying two deletions (0.5 and 3 Mb) on chromosome 9, a 1.1 Mb duplication on chromosome 10 and a duplication of ~27 Mb on chromosome 16 in child 1. (B) In child 2, three duplications on chromosome 9 (4.5, 12 and 3 Mb) and two deletions on chromosome 12 (150 kb and 2 Mb) were detected by SNP array analysis. Previously published data, deposited in the NCBI Gene Expression Omnibus under accession number GSE37906<sup>8</sup>. (C) A 0.7 Mb deletion on chromosome 1 and a 2.3 Mb duplication on chromosome 3 were detected in child 3.

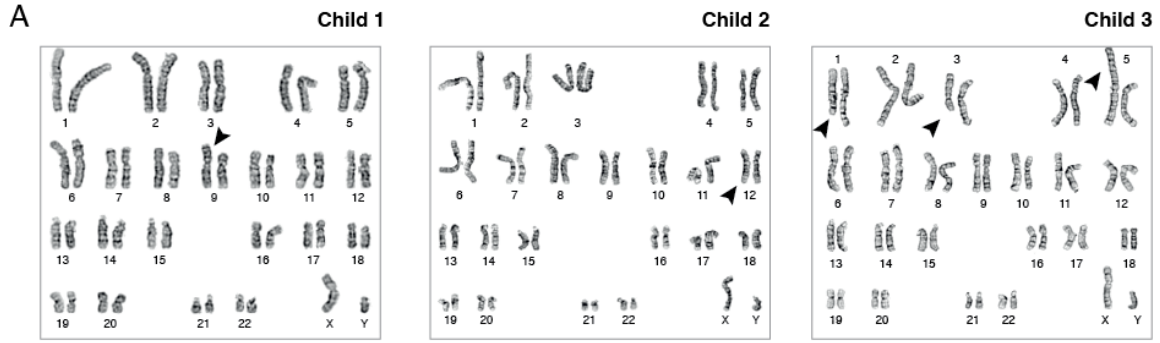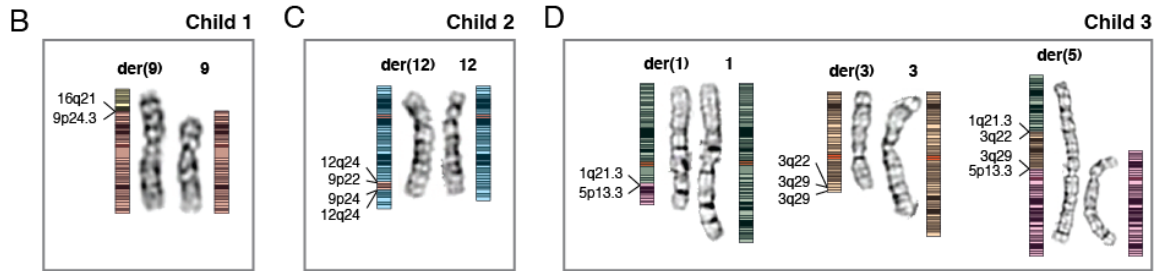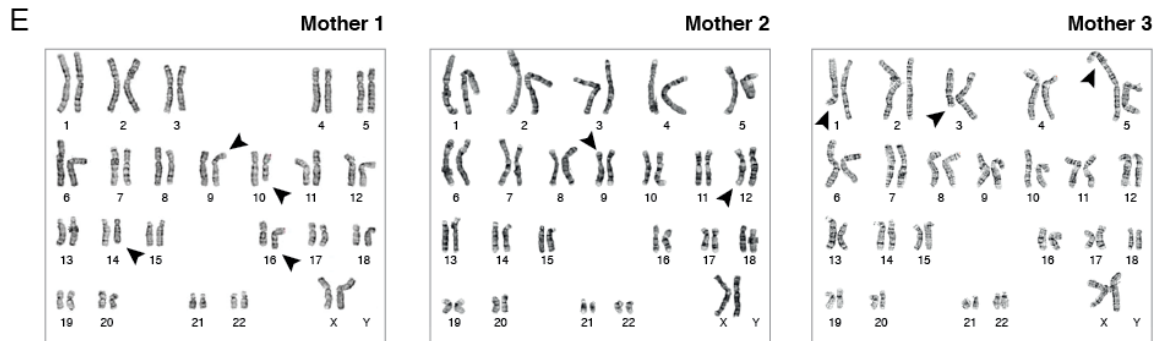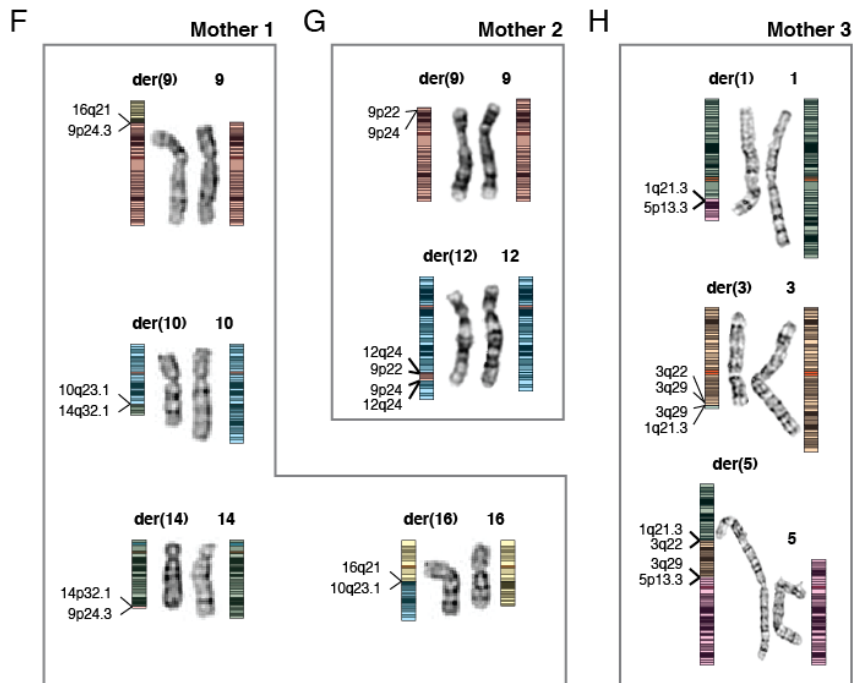

**Figure S2. Karyograms of the children and mothers.** (A) Karyogram of child 1, 2 and 3. (B-D) Partial karyograms and schematic diagrams of derivative chromosomes detected in child 1 (B), 2 (C) and 3 (D). (E) Karyogram of mother 1, 2 and 3. (F-H) Partial karyograms and schematic diagrams of the derivative chromosomes detected in mother 1 (F), 2 (G) and 3 (H).

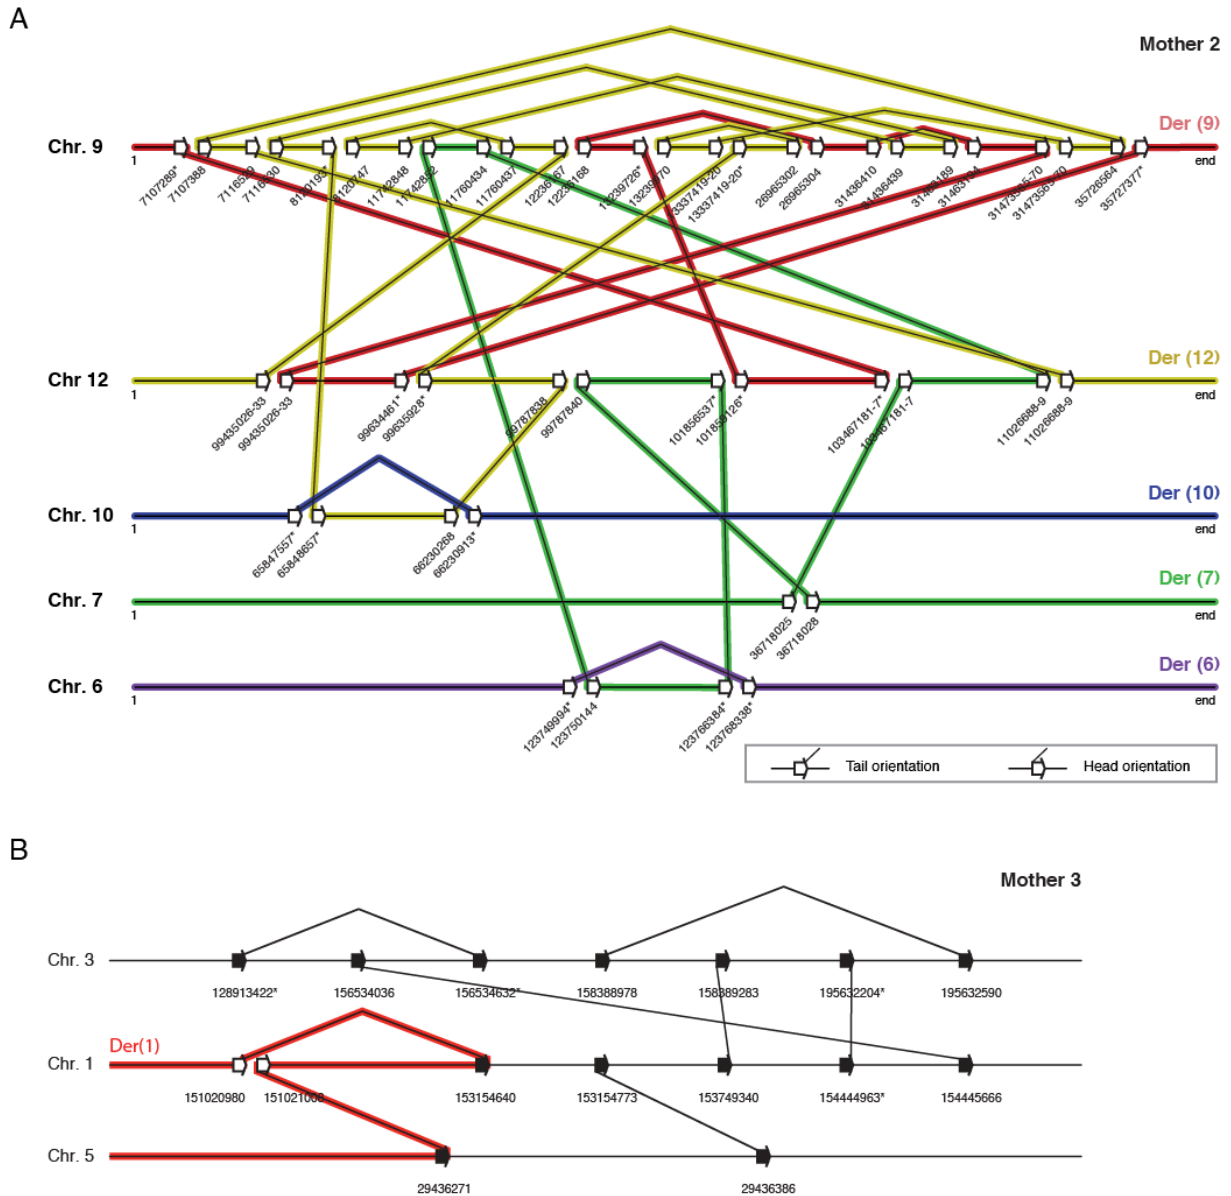

**Figure S3. Schematic diagram showing the genomic positions and orientations of breakpoint junctions in mother 2 (A) and 3 (B).** Sets of adjacent white arrows indicate a double-strand break (DSB), connecting lines between two arrows indicate breakpoint junctions. (A) Mate-pair sequencing revealed 23 breakpoint junctions involving five chromosomes in mother 2. Colored lines indicate predicted derivative chromosomes. The rearrangements gave rise to five derivative chromosomes der(6) (purple), der(7) (green), der(9) (red), der(10) (blue) and der(12) (yellow). Previously published data, deposited in the European Nucleotide Archive under accession number ERP001035<sup>8</sup>. (B) Mate-pair sequencing revealed at least 8 breakpoint junctions involving three chromosomes in mother 3. Due to the repetitive nature of the 3q29 region involved in the rearrangements we were unable to fully reconstruct the derivative chromosomes for this individual.

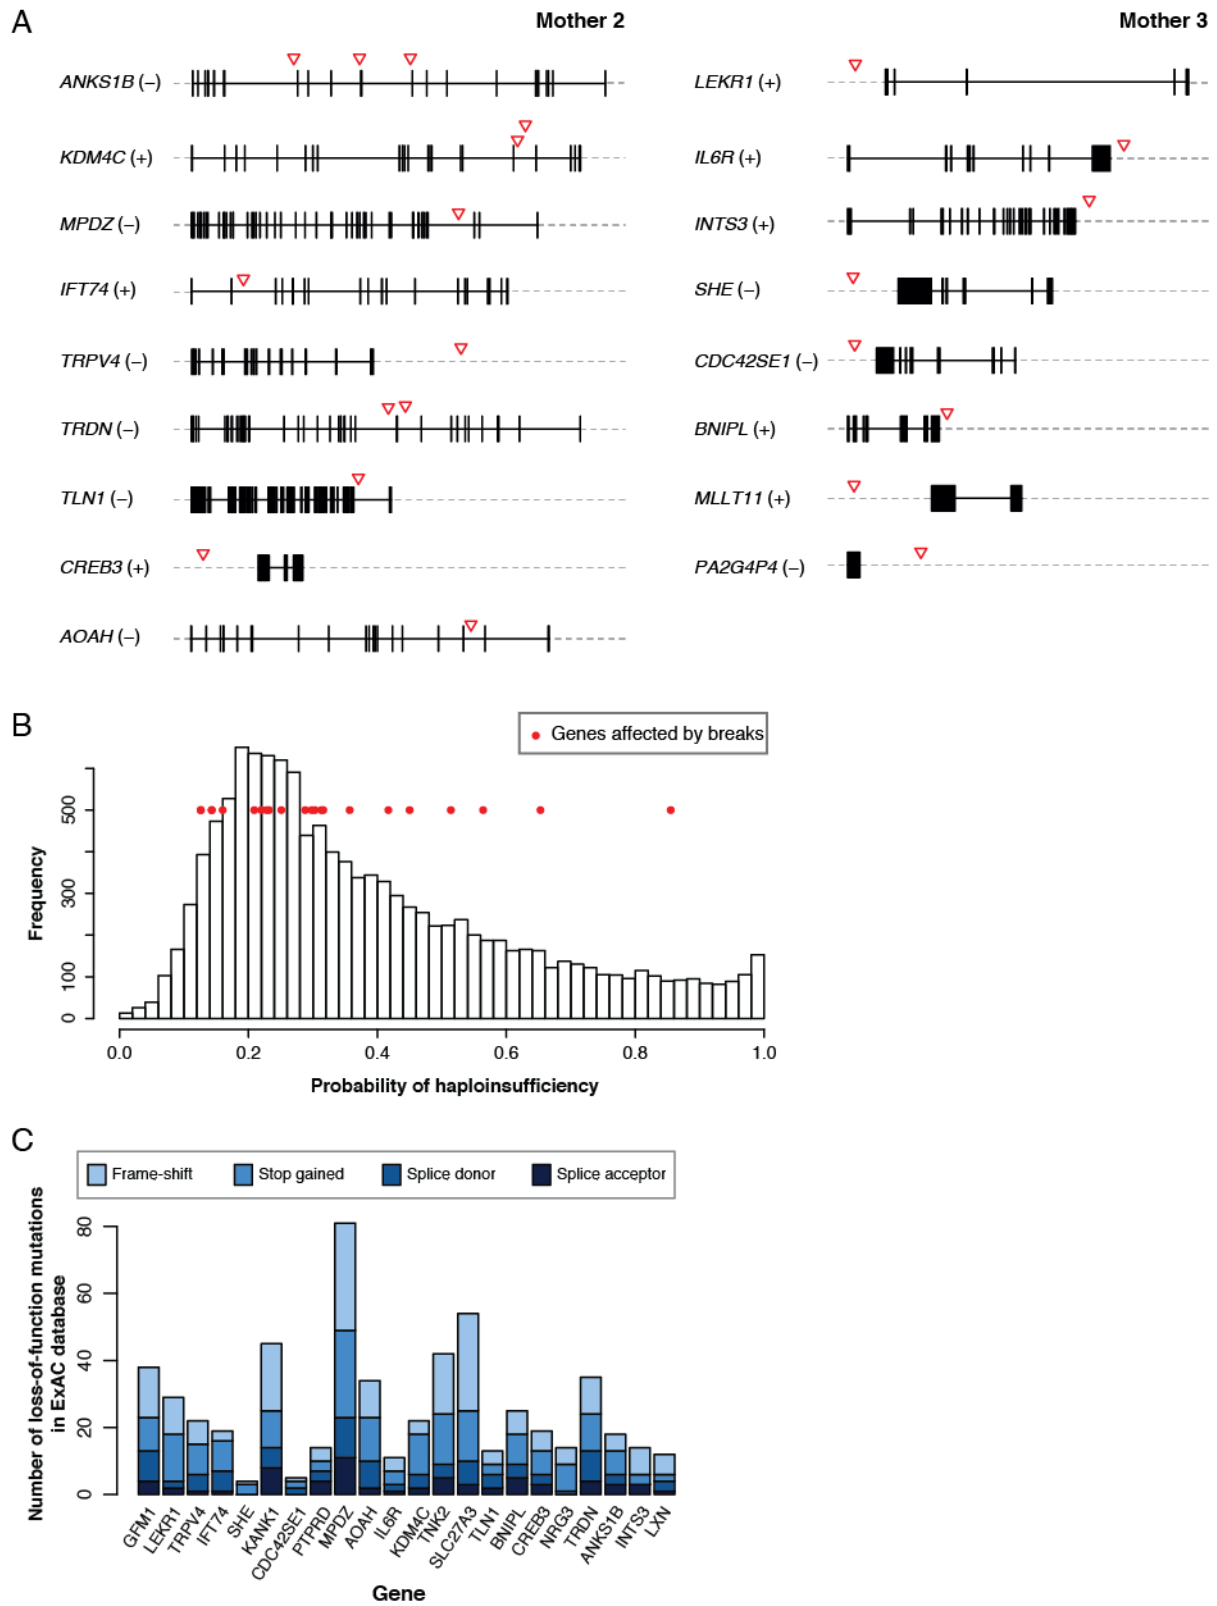

**Figure S4.** Chromothripsis directly affects protein-coding genes. (A) Gene structure and indication of breakpoint positions (triangles). (B) Predicted probability of haploinsufficiency for all genes affected by

chromothripsis breakpoints (red dots) relative to 12,218 genes in the genome (histogram)<sup>17</sup>. (C) Presence of loss-of-function mutations in genes affected by chromothripsis breakpoints. Loss-of-function mutations are derived from the exome aggregation consortium.

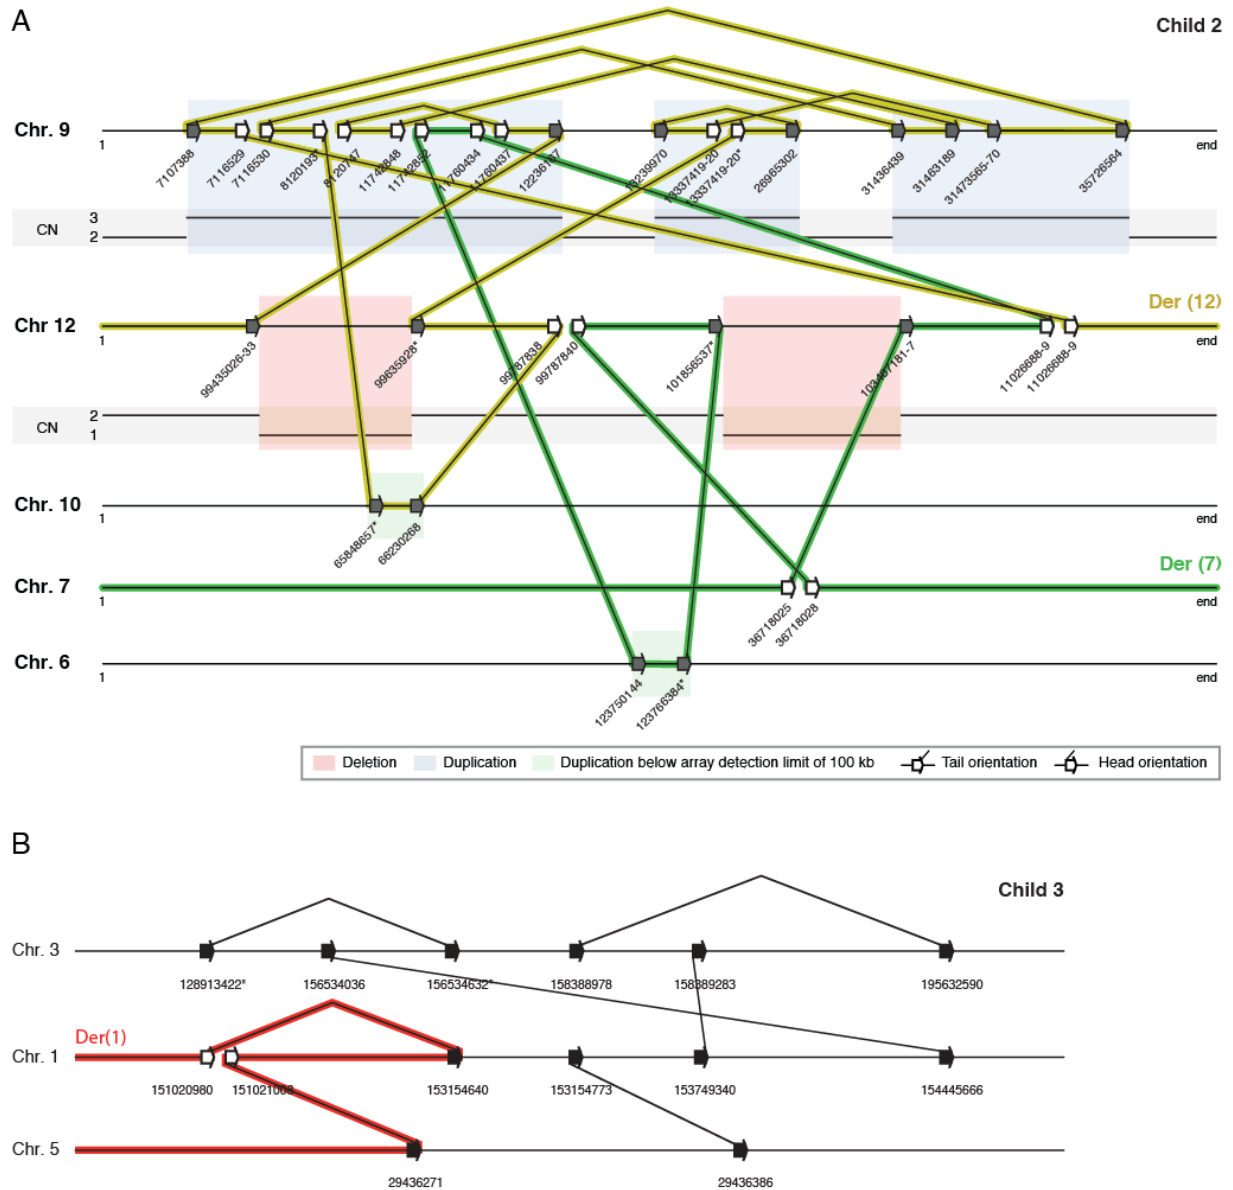

**Figure S5. Rearrangements detected in child 2 and 3.** Sets of adjacent white arrows indicate a double-strand break (DSB), grey arrows indicate a single end of a break that was found to be a DSB in the mother. Connecting lines between two arrows indicate breakpoint junctions. (A) Mate-pair sequencing revealed 16 breakpoint junctions in child 2. The chromosome 9 duplications can be explained by the presence of these fragments on der(12), which was inherited by the child. The deleted fragments of chromosome 12 are located on der(9), which was not inherited. Previously published data, deposited in the European Nucleotide Archive under accession number ERP001035<sup>8</sup>. (B) 7 Breakpoint junctions were detected in child 3. The presence of the chromothripsis rearrangements in the mother gave rise to unstable transfer of the chromothripsis chromosomes to her child. All but one breakpoint junctions detected in the mother were also detected in her child. Due to the repetitive nature of the 3q29 region involved in the rearrangements we could not fully reconstruct the derivative chromosomes in this child.



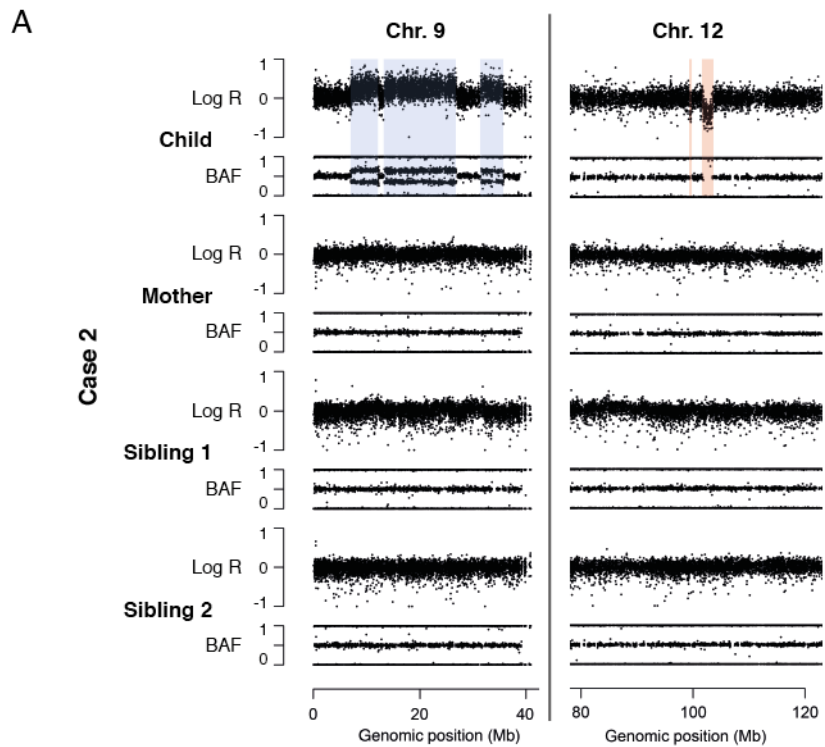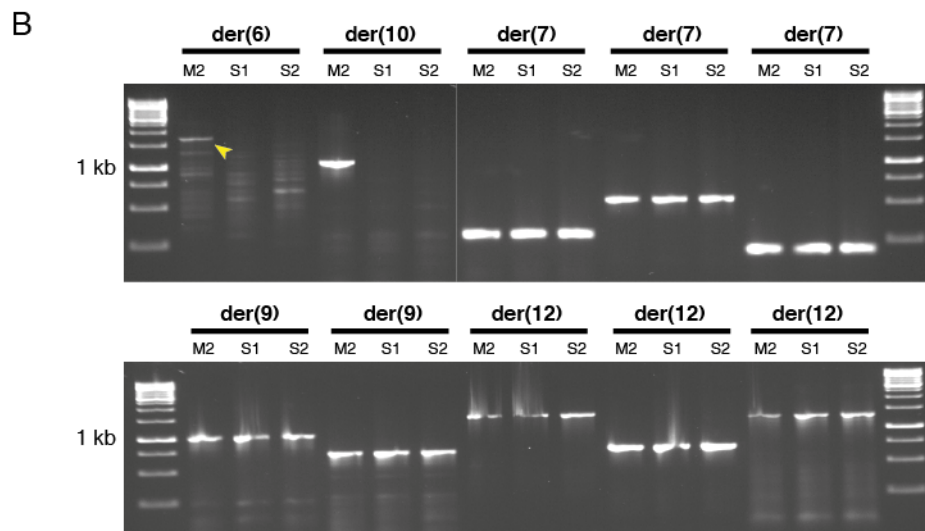

**Figure S6. PCR and SNP array results for the two siblings of child 2.** Partial inheritance of a different subset of chromothripsis chromosomes from the mother leads to a more copy number balanced state in two siblings of child 2. (A) SNP array results for the child, mother and two siblings in case 2. Child 2 carries three duplications on chromosome 9 and two deletions on chromosome 12 which are unique to this child. (B) PCR and Sanger sequencing revealed both siblings, like child 2, also inherited der(7) and der(12) and not der(6) and der(10) from their mother; however, unlike child 2, they additionally inherited der(9), leading to the copy neutral state of chromosome 9 and 12. Abbreviations are as follows: M2, mother 2; S1, sibling 1; S2, sibling 2.

## Supplemental Tables

**Table S1. Phenotypic and genomic characteristics of the children and mothers described in this study.** Coordinates are in hg19. Abbreviations are as follows: C, child; M, mother; MP-seq, mate-pair sequencing.

| C/M | Clinical phenotype                                                                                                                                                                                                                                                                                                                                                                                                       | Birth/pregnancy history                                                                                                                                                                                                                 | Cytogenetic result                                                                                                                                                                                                                            | # of breakpoint junctions detected (MP-seq) | Chromosomes involved |
|-----|--------------------------------------------------------------------------------------------------------------------------------------------------------------------------------------------------------------------------------------------------------------------------------------------------------------------------------------------------------------------------------------------------------------------------|-----------------------------------------------------------------------------------------------------------------------------------------------------------------------------------------------------------------------------------------|-----------------------------------------------------------------------------------------------------------------------------------------------------------------------------------------------------------------------------------------------|---------------------------------------------|----------------------|
| C1  | Ambiguous genitals; prominent forehead; hypertelorism; downslant; periorbital oedema; beaked nose; thin lips; low-set ears; pointy chin; clinodactyly 5 <sup>th</sup> digits; right foot: syndactyly (2 <sup>nd</sup> -3 <sup>rd</sup> digits), 2 rudimentary digits (4 <sup>th</sup> and 5 <sup>th</sup> ). Li- g.b; asymmetrically enlarged ventricles, gallbladder agenesis; multiple VSDs and open ductus, hypotonic | 1 <sup>st</sup> pregnancy, caesarean section at 34.7 weeks of gestation<br>Birth weight: 1900g (10 <sup>th</sup> centile)<br>Birth length: unknown<br>Head circumference: 31 cm (10 <sup>th</sup> centile)                              | 46,XY,der(9)t(9;14;10;16)(p24.3;q32.1;q23.1;q21)mat.arr 9p24.3(193,993-615,714)x1,9p23(9,043,125-12,048,982)x1,10q23.1(84,551,375-85,687,314)x3,16q21q24.3(61,374,670-88,690,771)x3                                                           | 5                                           | 9, 10, 14, 16        |
| M1  | No clinical phenotype                                                                                                                                                                                                                                                                                                                                                                                                    | 1.5 years until first pregnancy, no miscarriages/spontaneous abortions, PCOS; 6 ovulations a year                                                                                                                                       | 46,XX,t(9;14;10;16)(p24.3;q32.1;q23.1;q21)                                                                                                                                                                                                    | 13                                          | 9, 10, 14, 16        |
| C2  | Severe mental and growth retardation, microcephaly, epicanthus, low-set ears, micrognathia, clinodactyly and hypoplastic phalanges of the fifth fingers, hypoplasia or absence of toenails, and extremely small genitals (For detailed description see: de Pater et al <sup>10</sup> )                                                                                                                                   | 2 <sup>nd</sup> pregnancy, uneventful and ended at 38.2 weeks of gestation.<br>Birth weight: 2570g (<3 <sup>rd</sup> centile)<br>Birth length: 49 cm (25 centile)<br>Head circumference: 32 cm (<3 <sup>rd</sup> centile) <sup>10</sup> | 46,XY,der(12)-ins(12;9)(q24.1;p22p24)mat.arr 9p23-p24.1(7,143,431-12,234,642)x3,9p21.2-p23(13,300,367-26,978,170)x3,9p31.3-p21.1(31,591,132-35,648,008)x3, 12q23.1(99,435,026-99,635,928)x1, 12q23.2(101,916,750-103,544,418)x1 <sup>10</sup> | 16                                          | 6, 7, 9, 10, 12      |
| M2  | Delayed psychomotor development and major learning difficulties, no dysmorphic features <sup>10</sup>                                                                                                                                                                                                                                                                                                                    | No history of previous miscarriages/spontaneous abortions, 1 <sup>st</sup> and 3 <sup>rd</sup> pregnancy ended in the birth of male infants sharing only the mothers' phenotype <sup>10</sup>                                           | 46,XX,ins(12;9)(q24.1;p22p24) <sup>10</sup>                                                                                                                                                                                                   | 23                                          | 6, 7, 9, 10, 12      |
| C3  | Hypotonia, mild facial dysmorphisms, severe psychomotor development, non-progressive white matter abnormalities, small hands with single transverse creases, feeding difficulties, recurrent upper airway infections, and severe intellectual disability (For detailed description see: van Binsbergen et al <sup>11</sup> )                                                                                             | 3 <sup>rd</sup> pregnancy, ended at 38 weeks of gestation<br>Birth weight: 2,425 g (5 <sup>th</sup> centile)<br>Birth length: 50 cm (50 <sup>th</sup> centile)<br>Head circumference: 36 cm (80 <sup>th</sup> centile) <sup>11</sup>    | 46,XY, der(1)(1pter->1q21.3::5p13.3->5pter),der(3)(3pter -> 3q22::3q29->3qter::3q29-> 3qter),der(5)(1qter -> 1q21.3::3q22 -> 3q29::5p13.3 -> 5qter).arr1q21.3(153751264-154439066) x 1,3q29(195420586-197837049) x 3 dn <sup>11</sup>         | 7                                           | 1, 3, 5              |
| M3  | No clinical phenotype <sup>11</sup>                                                                                                                                                                                                                                                                                                                                                                                      | One previous elective abortion and one early miscarriage <sup>11</sup>                                                                                                                                                                  | 46,XX, der(1)(1pter->1q21.3::5p13.3->5pter),der(3)(3pter -> 3q22::3q29 -> 3qter::1q21.3 -> 1q21.3:),der(5)(1qter -> 1q21.3::3q22 -> 3q29::5p13.3 -> 5qter). arr(1-22,X) x 2 <sup>11</sup>                                                     | 8                                           | 1, 3, 5              |

**Table S2. Breakpoint junctions detected in all three cases (mothers and children) by mate-pair sequencing and PCR and Sanger sequencing.** Additional information per column:

<sup>a</sup> For every breakpoint junction our analysis pipeline specifies the coordinates of the boundaries of the two genomic fragments that are connected together. Coordinates represent the outer boundaries derived from all mate-pair clones supporting the breakpoint junction. Chr1, s1 and e1 specify the chromosome and left and right coordinate of the first fragment respectively. Similarly chr2, s2 and e2 specify the chromosome and coordinates of the second fragment.

<sup>b</sup> Individuals the specific breakpoint junction was detected in: M, mother; F, father; C, child. Count represents the number of reads covering the breakpoint junction.

<sup>c</sup> Orientation of the breakpoint (BP) junction between the two chromosomal fragments specified in each row. A fragment can be detected at its head (H) or tail (T) side to another fragment. The first letter (H or T) indicates the orientation of fusion of the first fragment (chr1, s1, e1) and the second letter indicates the fusion orientation of the second fragment (chr2, s2, e2).

<sup>d</sup> Total number of unique mate-pair reads supporting the breakpoint junction. All reads were uniquely identified in the indicated mother and or child and not in any of 150 control mate-pair datasets.

<sup>e</sup> For every breakpoint junction, chr1 and bp1 indicate the exact breakpoint location of the first, and chr2 and bp2 that of the second of the two fragments that are connected together at the specific breakpoint junction. Abbreviations are as follows: nd, not detected by PCR; nt, not tested by PCR.

<sup>f</sup> Individuals the breakpoint junction was confirmed in by PCR and Sanger sequencing; M, mother; C, child.

<sup>g</sup> Characteristics of the breakpoint junction. Chromosomal fragments can be either fused blunt, the connection can be guided by microhomologous sequences at either end of the junction or a few (non-templated) nucleotides can be inserted between the two connected ends. Bp change represents microhomology or inserted sequence found at the breakpoint junction.

<sup>h</sup>PCR products for these breakpoint junctions were >1.5 kb, which exceeds the maximum read length of Sanger sequencing (~650 bp). Sequencing using the forward primer identified the first fragment, the reverse primer identified the second fragment of the breakpoint junction.

| Case   | Mate-Pair sequencing results |                 |                 |                   |                 |                 |                                  |                                      |                          | PCR and Sanger sequencing results |                  |                   |                  |                       |                                   |                        |
|--------|------------------------------|-----------------|-----------------|-------------------|-----------------|-----------------|----------------------------------|--------------------------------------|--------------------------|-----------------------------------|------------------|-------------------|------------------|-----------------------|-----------------------------------|------------------------|
|        | chr1 <sup>a</sup>            | s1 <sup>a</sup> | e1 <sup>a</sup> | chr2 <sup>a</sup> | s2 <sup>a</sup> | e2 <sup>a</sup> | Individual (counts) <sup>b</sup> | BP junction orientation <sup>c</sup> | Total count <sup>d</sup> | chr1 <sup>e</sup>                 | bp1 <sup>e</sup> | chr2 <sup>e</sup> | bp2 <sup>e</sup> | Bp conf. <sup>f</sup> | Breakpoint signature <sup>g</sup> | Bp change <sup>g</sup> |
| case 1 | 9                            | 10640282        | 10641388        | 9                 | 12067163        | 12069048        | M(4)F(0)C(0)                     | TT                                   | 4                        | 9                                 | 10642756         | 9                 | 12069307         | M                     | Microhomology                     | A                      |
| case 1 | 10                           | 85708440        | 85709723        | 16                | 62811907        | 62813013        | M(4)F(0)C(0)                     | HT                                   | 4                        | 10                                | 85707849         | 16                | 62814401         | M                     | Blunt                             | -                      |
| case 1 | 9                            | 10643066        | 10645130        | 14                | 87959160        | 87960589        | M(7)F(0)C(0)                     | HH                                   | 7                        | 9                                 | 10642768         | 14                | 87958400         | M                     | Insertion                         | T                      |
| case 1 | 9                            | 9874447         | 9875887         | 9                 | 10397725        | 10400216        | M(8)F(0)C(0)                     | TT                                   | 8                        | 9                                 | 9876859          | 9                 | 10400356         | M                     | Microhomology                     | TGTCAT                 |
| case 1 | 9                            | 9877636         | 9880121         | 9                 | 10184962        | 10187413        | M(11)F(0)C(0)                    | HH                                   | 11                       | 9                                 | 9876864          | 9                 | 10184654         | M                     | Microhomology                     | GA                     |
| case 1 | 16                           | 62814654        | 62819507        | 16                | 62837225        | 62840110        | M(2)F(0)C(15)                    | HH                                   | 17                       | 16                                | 62814403         | 16                | 62837185         | C,M                   | Microhomology                     | T                      |
| case 1 | 9                            | 9039041         | 9043602         | 9                 | 12069501        | 12073773        | M(5)F(0)C(16)                    | TH                                   | 21                       | 9                                 | 9043619          | 9                 | 12069309         | C,M                   | Blunt                             | -                      |
| case 1 | 9                            | 633474          | 636448          | 9                 | 9043966         | 9046015         | M(2)F(0)C(19)                    | HT                                   | 21                       | 9                                 | 633072           | 9                 | 9046145          | C,M                   | Blunt                             | -                      |
| case 1 | 9                            | 9043986         | 9045832         | 10                | 84550840        | 84554624        | M(2)F(0)C(24)                    | HH                                   | 26                       | 9                                 | 9043621          | 10                | 84550262         | C,M                   | Microhomology                     | A                      |
| case 1 | 10                           | 85704055        | 85707766        | 16                | 62832514        | 62837165        | M(8)F(0)C(29)                    | TT                                   | 37                       | 10                                | 85707839         | 16                | 62837183         | C,M                   | Insertion                         | T                      |
| case 1 | 14                           | 87956251        | 87957402        | 9                 | 630972          | 632755          | M(3)F(0)C(0)                     | TT                                   | 3                        | 14                                | 87958400         | 9                 | 633072           | M                     | Blunt                             | -                      |
| case1  | 10                           | 84549834        | 84549834        | 9                 | 9048033         | 9048033         | M(1)F(0)C(0)                     | TH                                   | 1                        | 10                                | 84550260         | 9                 | 9046159          | M                     | Blunt                             | -                      |
| case1  | 9                            | 10182312        | 10184604        | 9                 | 10400974        | 10404035        | M(7)F(0)C(0)                     | TH                                   | 7                        | 9                                 | 10184643         | 9                 | 10400358         | M                     | Blunt                             | -                      |

|        |    |           |           |    |           |           |                |    |    |    |           |    |           |     |                                |               |
|--------|----|-----------|-----------|----|-----------|-----------|----------------|----|----|----|-----------|----|-----------|-----|--------------------------------|---------------|
| case 2 | 7  | 36718108  | 36721671  | 12 | 99787831  | 99790893  | M(11)F(0)C(10) | HH | 21 | 7  | 36718028  | 12 | 99787840  | C,M | Microhomology                  | G             |
| case 2 | 9  | 11739802  | 11742710  | 9  | 31460247  | 31463007  | M(4)F(0)C(3)   | TT | 7  | 9  | 31463189  | 9  | 11742848  | C,M | Blunt                          | -             |
| case 2 | 9  | 11758195  | 11759972  | 12 | 110263742 | 110266538 | M(3)F(0)C(2)   | TT | 5  | 9  | 11760434  | 12 | 110266889 | C,M | Blunt                          | -             |
| case 2 | 9  | 7104763   | 7106960   | 12 | 103464346 | 103466774 | M(11)F(0)C(0)  | TT | 11 | 9  | 7107289   | 12 | 103467187 | M   | Flanks identified <sup>h</sup> | -             |
| case 2 | 9  | 12236188  | 12238989  | 9  | 26965673  | 26968013  | M(10)F(0)C(0)  | HH | 10 | 9  | 12236168  | 9  | 26965304  | M   | Microhomology                  | TTG           |
| case 2 | 9  | 13236665  | 13239425  | 12 | 101859464 | 101861141 | M(7)F(0)C(0)   | TH | 7  | 9  | 13239726  | 12 | 101859126 | M   | Flanks identified <sup>h</sup> | -             |
| case 2 | 6  | 123750357 | 123752276 | 9  | 11743072  | 11746336  | M(9)F(0)C(3)   | HH | 12 | 6  | 123750144 | 9  | 11742852  | C,M | Microhomology                  | A             |
| case 2 | 6  | 123765872 | 123766384 | 12 | 101856510 | 101856537 | M(2)F(0)C(0)   | TT | 2  | nd | nd        | nd | nd        | nd  | -                              | -             |
| case 2 | 9  | 31433337  | 31436333  | 9  | 31463517  | 31465231  | M(4)F(0)C(0)   | TH | 4  | 9  | 31436410  | 9  | 31463194  | M   | Microhomology                  | GA            |
| case 2 | 9  | 31471300  | 31473229  | 12 | 99435218  | 99436825  | M(6)F(0)C(0)   | TH | 6  | 9  | 31473570  | 12 | 99435026  | M   | Blunt                          | -             |
| case 2 | 6  | 123748945 | 123750012 | 6  | 123768304 | 123769906 | M(6)F(0)C(0)   | TH | 6  | 6  | 123749994 | 6  | 123768338 | M   | Flanks identified <sup>h</sup> | -             |
| case 2 | 10 | 66227201  | 66230197  | 12 | 99785257  | 99787355  | M(3)F(0)C(2)   | TT | 5  | 10 | 66230268  | 12 | 99787838  | C,M | Complex                        | -             |
| case 2 | 9  | 8118030   | 8119888   | 10 | 65848657  | 65850658  | M(2)F(0)C(2)   | TH | 4  | 9  | 8120193   | 10 | 65848657  | C,M | Only one flank identified      | -             |
| case 2 | 7  | 36714976  | 36717979  | 12 | 103467238 | 103470137 | M(5)F(0)C(7)   | TH | 12 | 7  | 36718025  | 12 | 103467181 | C,M | Blunt                          | -             |
| case 2 | 9  | 7107641   | 7109780   | 9  | 35723601  | 35726283  | M(8)F(0)C(6)   | HT | 14 | 9  | 7107388   | 9  | 35726564  | C,M | Microhomology                  | A             |
| case 2 | 9  | 13334672  | 13337076  | 9  | 31473792  | 31476201  | M(6)F(0)C(5)   | TH | 11 | 9  | 13337420  | 9  | 31473565  | C,M | Microhomology                  | TT            |
| case 2 | 9  | 13240004  | 13241557  | 9  | 26962041  | 26964677  | M(2)F(0)C(4)   | HT | 6  | 9  | 13239970  | 9  | 26965302  | C,M | Blunt                          | -             |
| case 2 | 9  | 7116561   | 7120299   | 9  | 31436447  | 31440029  | M(7)F(0)C(5)   | HH | 12 | 9  | 7116530   | 9  | 31436439  | C,M | Blunt                          | -             |
| case 2 | 9  | 8121313   | 8122780   | 9  | 11760865  | 11763707  | M(5)F(0)C(4)   | HH | 9  | 9  | 8120747   | 9  | 11760437  | C,M | Microhomology                  | TGAG          |
| case 2 | 9  | 12233990  | 12236078  | 12 | 99431406  | 99434124  | M(11)F(0)C(6)  | TT | 17 | 9  | 12236167  | 12 | 99435033  | C,M | Microhomology                  | G             |
| case 2 | 9  | 7113602   | 7116395   | 12 | 110267135 | 110269429 | M(10)F(0)C(6)  | TH | 16 | 9  | 7116529   | 12 | 110266889 | C,M | Blunt                          | -             |
| case 2 | 9  | 13337440  | 13340068  | 12 | 99636114  | 99638904  | M(4)F(0)C(6)   | HH | 10 | 9  | 13337419  | 12 | 99635928  | C,M | Only one flank identified      | -             |
| case 2 | 10 | 65844061  | 65847557  | 10 | 66230913  | 66234003  | M(7)F(0)C(0)   | TH | 7  | nt | nt        | nt | nt        | nt  | -                              | -             |
| case 2 | 12 | 99634461  | 99634461  | 9  | 35727377  | 35727377  | M(1)F(0)C(0)   | TH | 1  | nt | nt        | nt | nt        | nt  | -                              | -             |
| case 3 | 3  | 158384939 | 158388876 | 3  | 195632595 | 195635632 | M(8)F(0)C(6)   | TH | 14 | 3  | 158388978 | 3  | 195632590 | C,M | Microhomology                  | GT            |
| case 3 | 1  | 154441965 | 154444308 | 3  | 195630328 | 195631725 | M(6)F(0)C(0)   | TT | 6  | 1  | 154444963 | 3  | 195632204 | M   | Flanks identified <sup>h</sup> | -             |
| case 3 | 1  | 154445895 | 154448216 | 3  | 156530510 | 156533437 | M(3)F(0)C(6)   | HT | 9  | 1  | 154445666 | 3  | 156534036 | C,M | Microhomology                  | CG            |
| case 3 | 1  | 153155549 | 153158347 | 5  | 29436496  | 29438223  | M(10)F(0)C(3)  | HH | 13 | 1  | 153154773 | 5  | 29436386  | C,M | Microhomology                  | AT            |
| case 3 | 1  | 151021102 | 151023743 | 5  | 29433067  | 29436167  | M(5)F(0)C(4)   | HT | 9  | 1  | 151021008 | 5  | 29436271  | C,M | Microhomology                  | GC            |
| case 3 | 3  | 128911732 | 128913422 | 3  | 156534632 | 156536932 | M(8)F(1)C(2)   | TH | 11 | nt | nt        | nt | nt        | nt  | -                              | -             |
| case 3 | 1  | 153746565 | 153748730 | 3  | 158389428 | 158392531 | M(7)F(0)C(1)   | TH | 8  | 1  | 153749340 | 3  | 158389283 | C,M | Microhomology                  | ACT           |
| case 3 | 1  | 151018679 | 151020295 | 1  | 153151785 | 153154013 | M(6)F(0)C(4)   | TT | 10 | 1  | 151020980 | 1  | 153154640 | C,M | Insertion                      | TGGGAAGCTGCAC |

**Table S3. Comparison of the rearrangement characteristics for each of the three mothers to the criteria for inference of chromothripsis as defined by Korbel and Campbell<sup>14</sup>**

| <b>Criteria for inference of chromothripsis</b>                                                                     | <b>Mother 1</b> | <b>Mother 2</b> | <b>Mother 3</b> |
|---------------------------------------------------------------------------------------------------------------------|-----------------|-----------------|-----------------|
| 1. Clustering of breakpoints                                                                                        | +               | +               | +               |
| 2. Regularity of oscillating copy-number states                                                                     | -               | -               | -               |
| 3. Prevalence of regions with interspersed loss and retention of heterozygosity                                     | -               | -               | -               |
| 4. Prevalence of rearrangements affecting a single haplotype                                                        | +               | +               | +               |
| 5. Randomness of DNA segment order and fragment joins                                                               | +               | +               | +               |
| 6. Ability to 'walk' the derivative chromosome if all rearrangements in a region with chromothripsis are detectable | +               | +               | + <sup>a</sup>  |

<sup>a</sup> Due to the repetitive nature of one of the regions involved in the rearrangements we were unable to detect all breakpoints in this individual and could therefore not reconstruct all derivative chromosomes

**Table S4. Effects of chromothripsis breakpoints on protein-coding genes.**

| Mother (case) | Gene symbol     | Gene name                                                          | Breakpoint location <sup>a</sup>                  | Phenotype MIM number                                                  | Probability of haploinsufficiency <sup>b</sup> |
|---------------|-----------------|--------------------------------------------------------------------|---------------------------------------------------|-----------------------------------------------------------------------|------------------------------------------------|
| 1             | <i>PTPRD</i>    | PROTEIN-TYROSINE PHOSPHATASE, RECEPTOR-TYPE, DELTA                 | 2 Breaks in intron; 2 breaks in 5' region of gene |                                                                       | 0.855                                          |
| 1             | <i>KANK1</i>    | KN MOTIF- AND ANKYRIN REPEAT DOMAIN-CONTAINING PROTEIN 1           | Break in intron                                   | 612900                                                                | 0.653                                          |
| 1             | <i>NRG3</i>     | NEUREGULIN 3                                                       | Break in intron                                   |                                                                       | 0.251                                          |
| 2             | <i>AOAH</i>     | ACYLOXYACYL HYDROLASE                                              | Break in intron                                   |                                                                       | 0.160                                          |
| 2             | <i>ANKS1B</i>   | ANKYRIN REPEAT AND STERILE ALPHA MOTIF DOMAINS-CONTAINING PROTEIN  | 3 Breaks in different introns                     |                                                                       | 0.313                                          |
| 2             | <i>TRPV4</i>    | TRANSIENT RECEPTOR POTENTIAL CATION CHANNEL, SUBFAMILY V, MEMBER 4 | Break in 5' region of gene                        | 184095;181405;168400;156530;113500;184252;600175;613508;606835;606071 | 0.228                                          |
| 2             | <i>KDM4C</i>    | LYSINE-SPECIFIC DEMETHYLASE 4C                                     | 2 Breaks in intron                                |                                                                       | Not defined                                    |
| 2             | <i>MPDZ</i>     | MULTIPLE PDZ DOMAIN PROTEIN                                        | Break in intron                                   | 615219                                                                | 0.450                                          |
| 2             | <i>IFT74</i>    | INTRAFLAGELLAR TRANSPORT 74, CHLAMYDOMONAS, HOMOLOG OF             | Break in intron                                   |                                                                       | 0.357                                          |
| 2             | <i>TRDN</i>     | TRIADIN                                                            | 2 Breaks in intron                                | 615441                                                                | 0.288                                          |
| 2             | <i>TLN1</i>     | TALIN 1                                                            | Break in intron                                   |                                                                       | 0.417                                          |
| 2             | <i>CREB3</i>    | cAMP RESPONSE ELEMENT-BINDING PROTEIN 3                            | Break in 5' region of gene                        |                                                                       | 0.298                                          |
| 3             | <i>GFM1</i>     |                                                                    | Break in intron                                   |                                                                       | 0.188                                          |
| 3             | <i>LXN</i>      | LATEXIN                                                            | Break in intron                                   |                                                                       | 0.303                                          |
| 3             | <i>TNK2</i>     | TYROSINE KINASE, NONRECEPTOR, 2                                    | Break in intron                                   |                                                                       | 0.514                                          |
| 3             | <i>SHE</i>      | SH2 DOMAIN-CONTAINING PROTEIN E                                    | 2 Breaks in 3' regions of gene                    |                                                                       | 0.143                                          |
| 3             | <i>IL6R</i>     | INTERLEUKIN 6 RECEPTOR                                             | Break in 3' region of gene                        | 614689;614752                                                         | 0.209                                          |
| 3             | <i>C1orf56</i>  |                                                                    | Break in exon                                     |                                                                       | 0.143                                          |
| 3             | <i>BNIPL</i>    | BCL2/ADENOVIRUS E1B 19-KD PROTEIN-INTERACTING PROTEIN 2-LIKE       | Break in 3' region of gene                        |                                                                       | Not defined                                    |
| 3             | <i>CDC42SE1</i> |                                                                    | Break in 3' region of gene                        |                                                                       | 0.316                                          |
| 3             | <i>MLLT11</i>   | MYELOID/LYMPHOID OR MIXED-LINEAGE LEUKEMIA, TRANSLOCATED TO, 11    | Break in 5' region of gene                        |                                                                       | 0.220                                          |
| 3             | <i>LEKR1</i>    | LEUCINE-, GLUTAMATE-, AND LYSINE-RICH PROTEIN 1                    | Break in 5' region of gene                        |                                                                       | 0.232                                          |
| 3             | <i>PA2G4P4</i>  |                                                                    | Break in 5' region of gene                        |                                                                       | Not defined                                    |
| 3             | <i>SLC27A3</i>  | SOLUTE CARRIER FAMILY 27 (FATTY ACID TRANSPORTER), MEMBER 3        | Break in intron                                   |                                                                       | 0.126                                          |
| 3             | <i>INTS3</i>    | INTEGRATOR COMPLEX SUBUNIT 3                                       | Break in 3' region of gene                        |                                                                       | 0.564                                          |

<sup>a</sup> We arbitrarily defined a 20kb region on the 5' and 3' part of the gene as the 5' and 3' region of the gene, respectively.

<sup>b</sup> Based on the method described by Huang et al.<sup>17</sup>
